# Supplementary material for: One-pot hydrodeoxygenation of bioderived furans into octane at low temperaturesviaan octanediol route
Source: Royal Society of Chemistry journal article supplement (doi:10.1039/d1gc00916h), 2021-01-01
Supplement: d1gc00916h1.pdf [file d1gc00916h1.pdf]

## Supporting Information

### **One-pot hydrodeoxygenation of bioderived furans into octane at low temperatures *via* an octanediol route**

Song Li,<sup>ab</sup> Qiaozhi Ma,<sup>c</sup> Wenxin Zhong,<sup>c</sup> Xuelai Zhao,<sup>ad</sup> Xiangqian Wei,<sup>ad</sup> Xinghua Zhang,<sup>a</sup> Qiyong Liu,<sup>a</sup> Chenguang Wang,<sup>a</sup> Longlong Ma,<sup>ad</sup> Qi Zhang<sup>\*ad</sup>

<sup>a</sup> Guangdong Provincial Key Laboratory of New and Renewable Energy Research and Development, CAS Key Laboratory of Renewable Energy, Guangzhou Institute of Energy Conversion, Chinese Academy of Sciences, Guangzhou 510640, PR China. E-mail: zhangqi@ms.giec.ac.cn; Fax: +86 20 87057789; Tel: +86 20 87057789.

<sup>b</sup> University of Chinese Academy of Sciences, Beijing 100049, PR China.

<sup>c</sup> College of Materials and Energy, South China Agricultural University, Guangzhou 510642, China.

<sup>d</sup> Department of Thermal Science and Energy Engineering, University of Science and Technology of China, Hefei, 233022, China.

## Contents page

|                                                                                |    |
|--------------------------------------------------------------------------------|----|
| Preparation details .....                                                      | 3  |
| The HDO of FA under different hydrogen pressure .....                          | 4  |
| <sup>13</sup> C-NMR spectra of liquid products after hydrogenation of FA ..... | 6  |
| Octane production for the HDO at 100 °C .....                                  | 7  |
| TEM micrographs of differernt catalysts .....                                  | 8  |
| XRD and FT-IR patterns of used catalysts .....                                 | 9  |
| <sup>13</sup> C-NMR spectra of FHOH .....                                      | 10 |
| <sup>13</sup> C-NMR spectra of BTHF .....                                      | 11 |
| Performance of different catalysts .....                                       | 12 |
| Time-course experiments for the HDO at 100 °C .....                            | 13 |
| Molecular fragments in mass spectra .....                                      | 14 |
| References .....                                                               | 15 |

## Preparation details

### Hydrogenation of FA:

100 mg of FA, 50 mg of 5 wt% Pd/C, 50 mg of HPW and 10 ml of cyclohexane were added into a Teflon tube. The sealed reactor was flushed with H<sub>2</sub> for four times and pressured to 1 MPa H<sub>2</sub>. The hydrogenation was carried out at 30 °C for 4 h. **Figure S3:** <sup>13</sup>C-NMR (101 MHz, Chloroform-*d*) δ=208.7 , 78.3 , 67.6 , 40.4 , 31.3 , 29.9 , 29.5 , 26.9 , 25.7.

### Preparation of FHOH<sup>1</sup>:

100 mg of FA, 20 mg of 5 wt% Ru/C and 10 ml of cyclohexane were added into a Teflon tube. The sealed reactor was flushed with H<sub>2</sub> for four times and pressured to 8 MPa H<sub>2</sub>. The autoclave was heated up to 50 °C and kept for 2 h with string at 400 rpm. After cooling down to room temperature, liquid products were collected by filtration through a 0.22 μm nylon membrane. FHOH was obtained after evaporation of solvent. **Figure S7:** <sup>13</sup>C-NMR (101 MHz, Chloroform-*d*) δ=79.7 , 79.5 , 68.1 , 67.8 , 67.6 , 36.6 , 35.9 , 32.5 , 31.6 , 31.5 , 31.4 , 25.7 , 25.6 , 23.6 , 23.3.

### Preparation of BTHF:

100 mg of 2-butylfuran, 50 mg of 5 wt% Pd/C, 50 mg of HPW and 10 ml of cyclohexane were added into a Teflon tube. The sealed reactor was flushed with H<sub>2</sub> for four times and pressured to 1 MPa H<sub>2</sub>. The autoclave was heated up to 80 °C and kept for 4 h with string at 400 rpm. After cooling down to room temperature, liquid products were collected by filtration through a 0.22 μm nylon membrane. BTHF was obtained after evaporation of solvent. **Figure S8:** <sup>13</sup>C-NMR (101 MHz, Chloroform-*d*) δ=67.6, 35.4, 31.4, 28.6, 25.7, 22.8, 14.1.

### D<sub>2</sub>O isotope labelling experiment:

After Pd/C-HPW300 was pretreated in cyclohexane, 100 mg of FA and 400 μl of D<sub>2</sub>O were added into the autoclave. The sealed reactor was flushed with H<sub>2</sub> for four times and pressured to 1 MPa H<sub>2</sub>. It was firstly hydrogenated at 50 °C for 4 h, followed by hydrodeoxygenation at 130 °C for 4 h. Liquid organic products were collected by filtration through a 0.22 μm nylon membrane.

## The HDO of FA under different hydrogen pressure

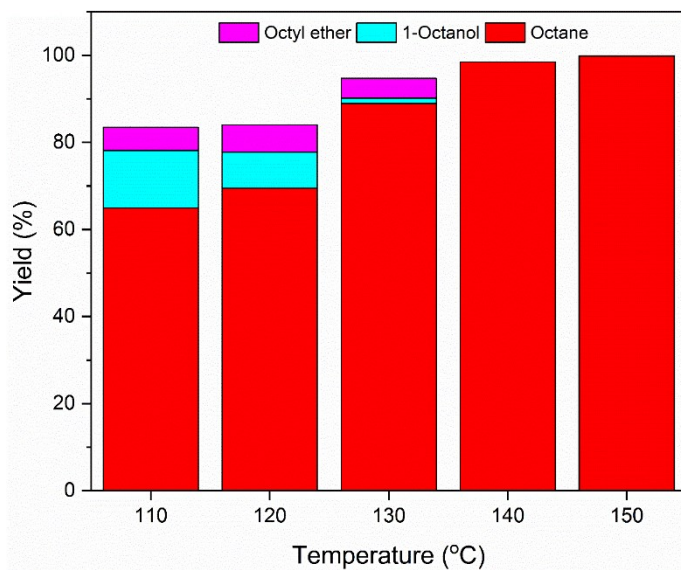

**Figure S1** The HDO of FA over Pd/C-HPW catalysts under 3 MPa H<sub>2</sub> at different temperature. Reaction conditions: FA (100 mg), cyclohexane (10 mL), Pd/C (50 mg), HPW (50 mg), 400 rpm, 4 h.

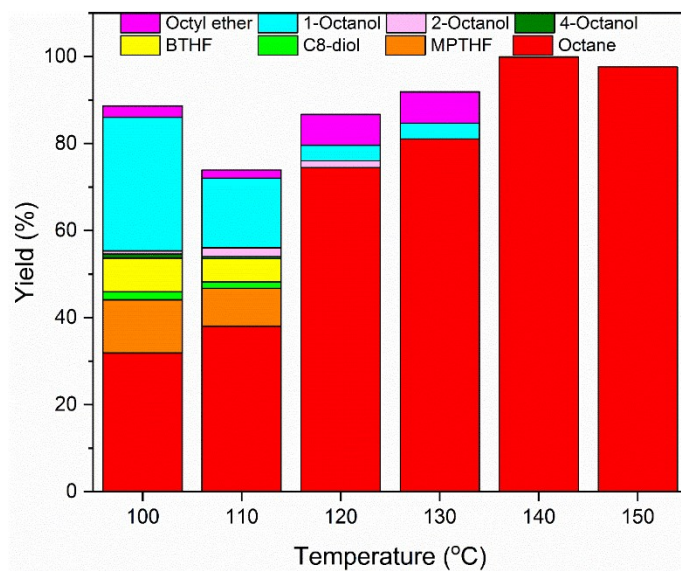

**Figure S2** The HDO of FA over Pd/C-HPW catalysts under 5 MPa H<sub>2</sub> at different temperature. Reaction conditions: FA (100 mg), cyclohexane (10 mL), Pd/C (50 mg), HPW (50 mg), 400 rpm, 4 h.

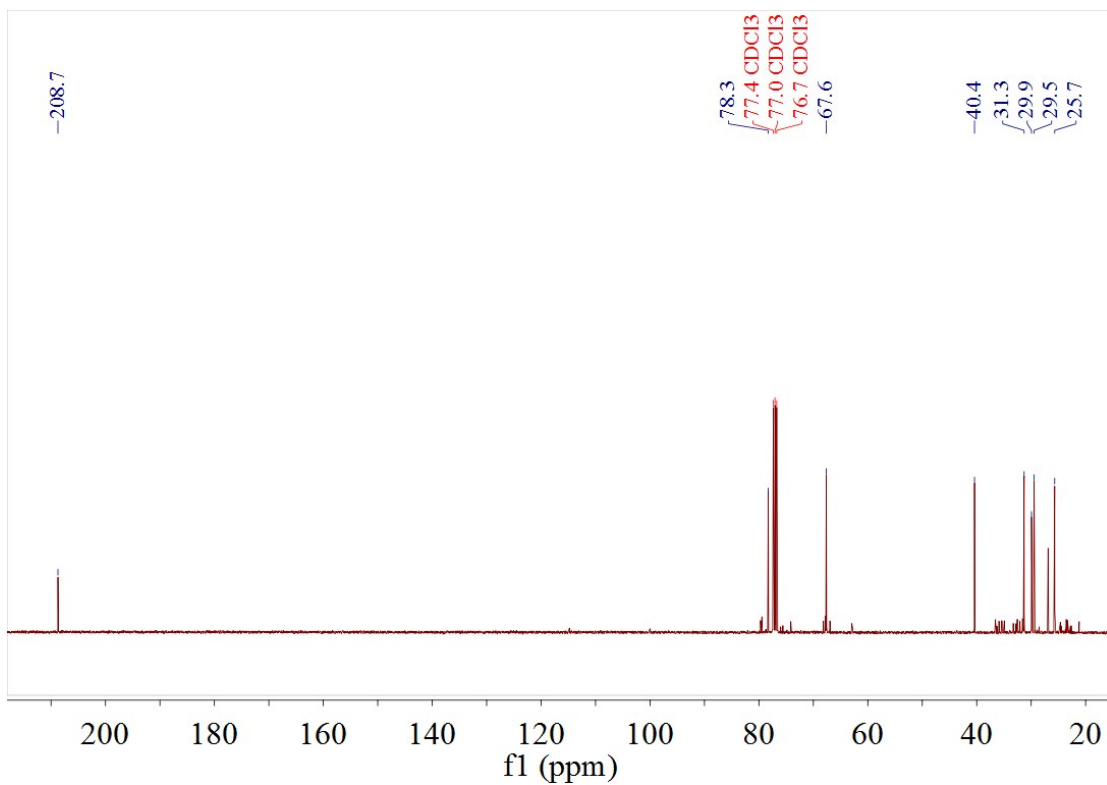

**Figure S3**  $^{13}\text{C}$ -NMR spectra of liquid products after hydrogenation of FA over Pd/C-HPW under 1 MPa  $\text{H}_2$  at 30 °C for 4h.

**$^{13}\text{C}$ -NMR spectra of liquid products after hydrogenation of FA**

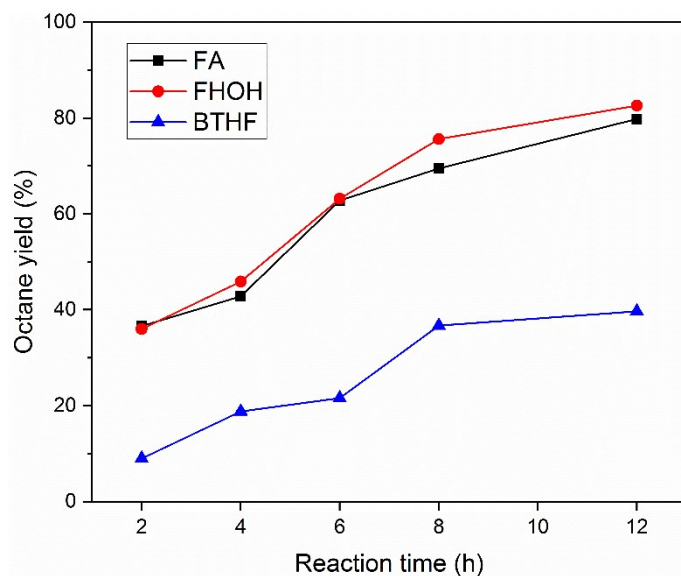

**Figure S4** The HDO of FA, FHOH and BTHF at 100 °C for different reaction time. Reaction conditions: FA, FHOH or BTHF (0.73 mmol), cyclohexane (10 mL), Pd/C (50 mg), HPW (50 mg), 1 MPa H<sub>2</sub> at room temperature, 100 °C, 400 rpm.

#### **Octane production for the HDO at 100 °C**

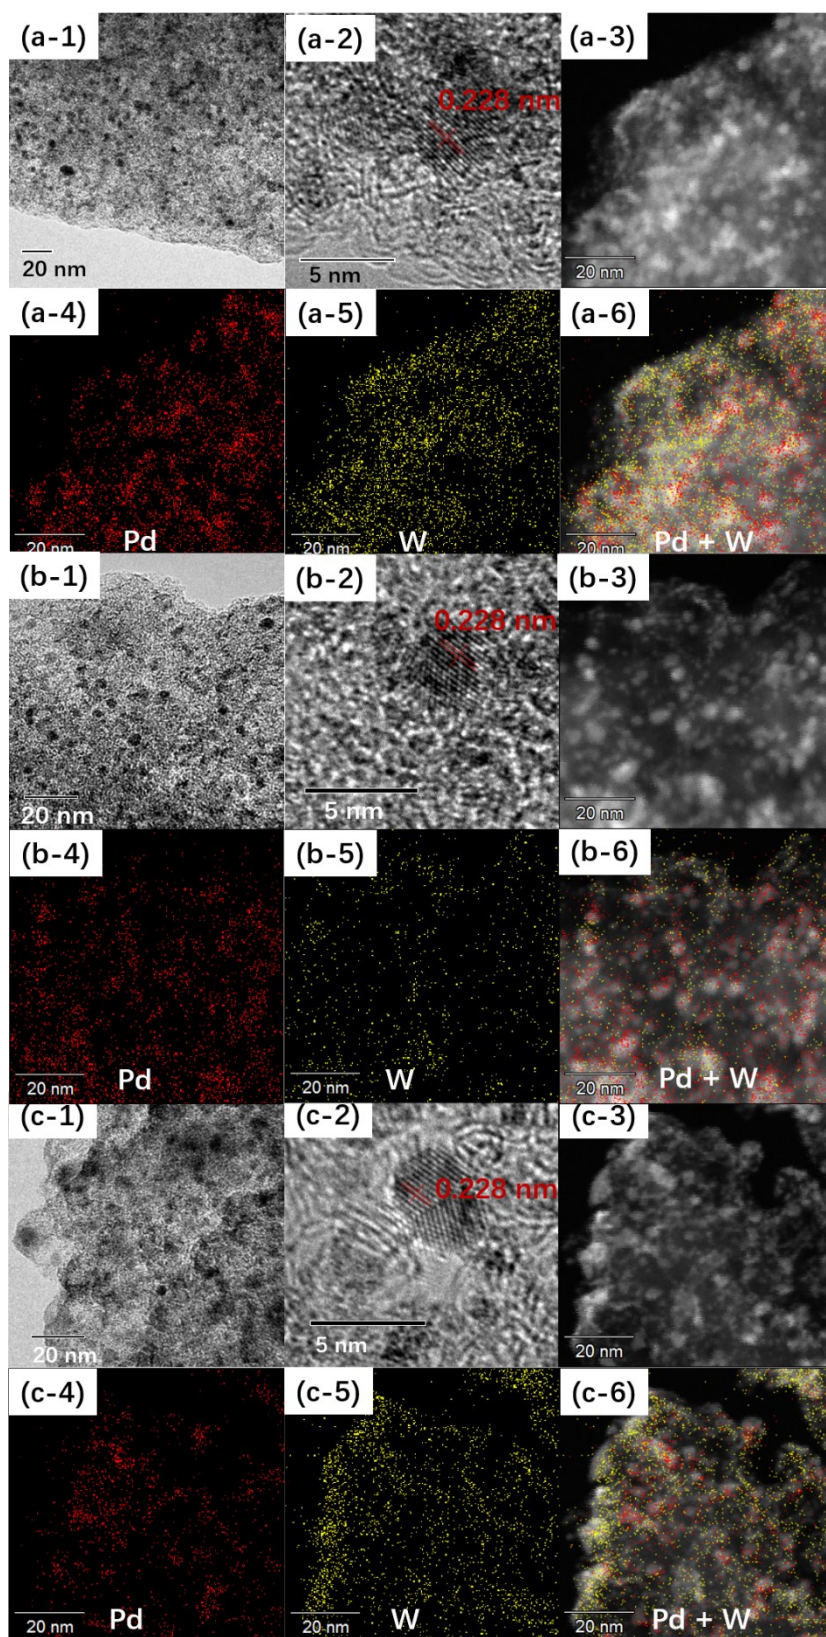

**Figure S5** TEM micrographs of (a) Pd/C-HPW, (b) Pd/C-HPW300 and (c) Pd/C-HPW300 promoted by water



## XRD and FT-IR patterns of used catalysts

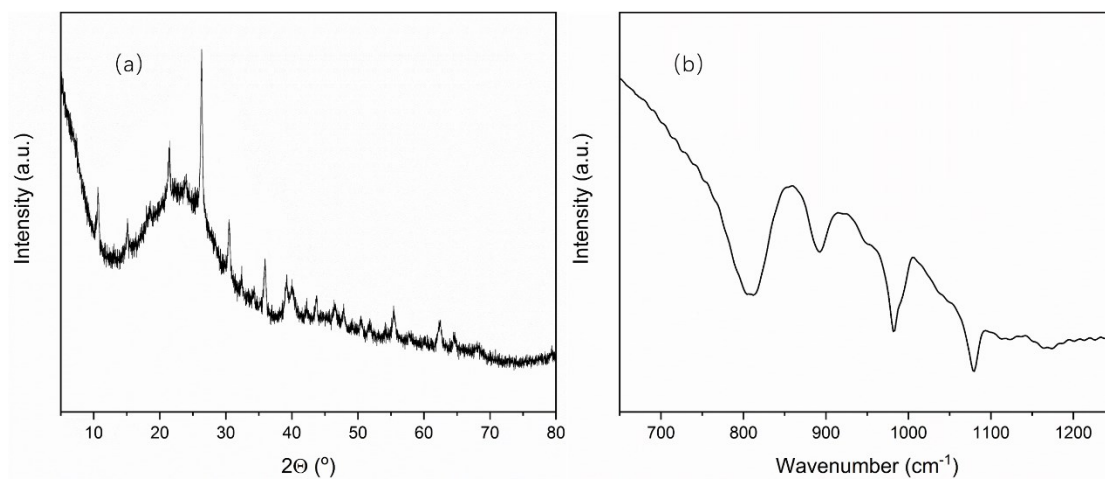

**Figure S6** (a) XRD and (b) FT-IR patterns of used catalysts.

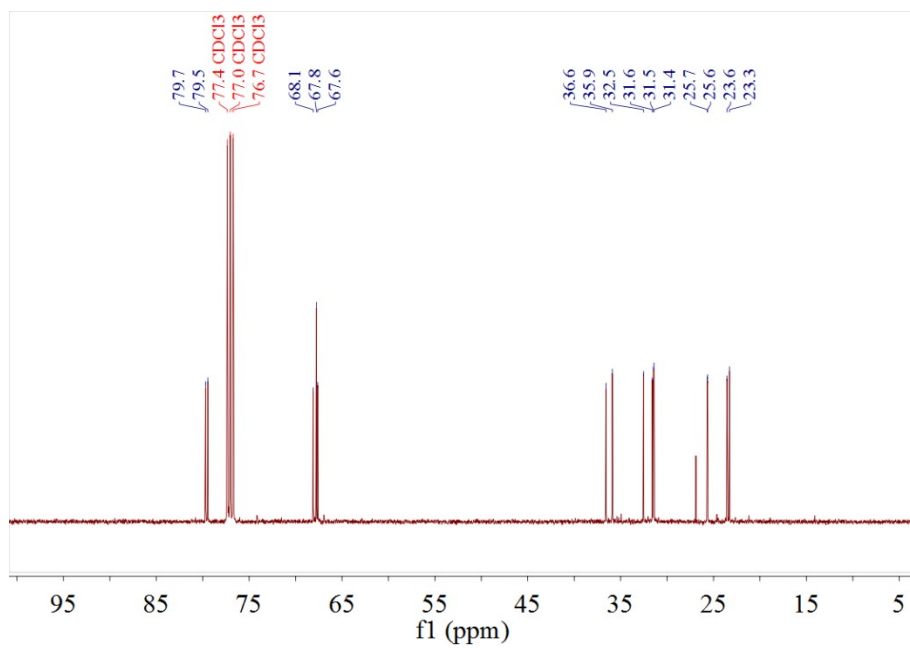

**Figure S7**  $^{13}\text{C}$ -NMR spectra of FHOH.

**$^{13}\text{C}$ -NMR spectra of FHOH**

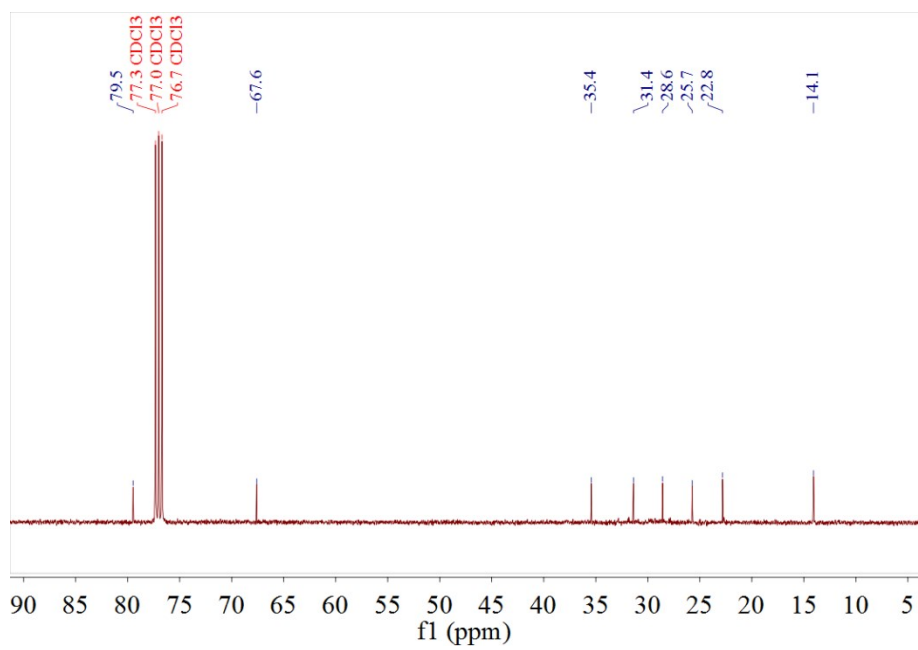

Figure S8  $^{13}\text{C}$ -NMR spectra of BTHF.

### $^{13}\text{C}$ -NMR spectra of BTHF

## Performance of different catalysts

**Table S1** Performance of different catalysts in hydrodeoxygenation of bioderived furans to alkanes

| Raw materials                                                                       | Catalysts                                                                                      | Conditions                                                                       | Alkanes                           | Yield(%) | Ref.         |
|-------------------------------------------------------------------------------------|------------------------------------------------------------------------------------------------|----------------------------------------------------------------------------------|-----------------------------------|----------|--------------|
| 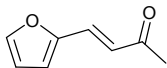   | Pd/Al <sub>2</sub> O <sub>3</sub> ,<br>4wt%Pt/SiO <sub>2</sub> -Al <sub>2</sub> O <sub>3</sub> | 5.5 MPa H <sub>2</sub> ,<br>120 °C, 5.5-6<br>MPa H <sub>2</sub> , 250-<br>265°C. | C <sub>8</sub>                    | 77.7     | 2            |
|    | Pd/NbOPO <sub>4</sub>                                                                          | 2 MPa H <sub>2</sub> ,<br>170°C, 24 h                                            | C <sub>8</sub>                    | 94       | 3            |
|    | Pd/10%Nb <sub>2</sub> O <sub>5</sub> /SiO <sub>2</sub>                                         | 2.5 MPa H <sub>2</sub> ,<br>170°C, 24 h                                          | C <sub>8</sub>                    | 99.5     | 4            |
|    | Ir-ReO <sub>x</sub> /SiO <sub>2</sub>                                                          | 5 MPa H <sub>2</sub> ,<br>180°C, 18 h.                                           | C <sub>28</sub>                   | 73.6     | 5            |
| R: -C <sub>10</sub> H <sub>21</sub>                                                 |                                                                                                |                                                                                  |                                   |          |              |
|   | 10% Ni 10%<br>Cu/Nb <sub>2</sub> O <sub>5</sub>                                                | 4 MPa H <sub>2</sub> ,<br>250°C, 12 h.                                           | C <sub>8</sub>                    | 86.5     | 6            |
|  | Pd/Al-MCM-41                                                                                   | 14 MPa CO <sub>2</sub> , 4<br>MPa H <sub>2</sub> , 60°C,<br>8 h,                 | C <sub>8</sub>                    | 99       | 7            |
|  | Ir-MoO <sub>x</sub> /SiO <sub>2</sub> (0.13)                                                   | 5 MPa H <sub>2</sub> ,<br>180°C, 24 h.                                           | C <sub>15</sub>                   | 85       | 8            |
|  | Pd/C-Hf(OTf) <sub>4</sub>                                                                      | 6 MPa H <sub>2</sub> ,<br>60°C, 8 h,<br>180°C, 20 h.                             | C <sub>9</sub>                    | 93       | 9            |
|  | Pd/C, glacial acetic<br>acid;<br>Pd/C-La(OTf) <sub>3</sub>                                     | 65°C, 2 h,<br>100°C, 3 h;<br>2.07 MPa H <sub>2</sub> ,<br>200°C, 16 h            | C <sub>9</sub>                    | 87       | 10           |
|  | 5%Pd-<br>2.5%FeO <sub>x</sub> /SiO <sub>2</sub>                                                | 1 atm H <sub>2</sub> , 300-<br>350°C                                             | C <sub>10</sub> , C <sub>11</sub> | 87-94    | 11           |
|  | Pt/Co <sub>2</sub> AlO <sub>4</sub> ,<br>Pt/NbOPO <sub>4</sub>                                 | 0.5-2 MPa,<br>130-150°C, 20<br>h; 2.5 MPa,<br>175°C.                             | C <sub>8</sub>                    | 76       | 12           |
|  | Pd/C-HPW                                                                                       | 1 MPa H <sub>2</sub> ,<br>130°C, 4 h.                                            | C <sub>8</sub>                    | 96.6     | This<br>work |

## Time-course experiments for the HDO at 100 °C

**Table S2** The HDO of FA, FHOH and BTHF at 100°C for different reaction time<sup>a</sup>

| Entry | Raw Materials | Time (h) | Conversion (%) | Yield (%) |       |          |      |           |           |             |      |
|-------|---------------|----------|----------------|-----------|-------|----------|------|-----------|-----------|-------------|------|
|       |               |          |                | Octane    | MPTHF | C8-diols | BTHF | 2-Octanol | 1-Octanol | Octyl ether | Sum  |
| 1     | FA            | 2        | 100.0          | 36.6      | 11.3  | 0.5      | 7.7  | 0.4       | 24.4      | 2.3         | 83.2 |
| 2     | FA            | 4        | 100.0          | 42.8      | /     | 8.4      | 4.4  | /         | 21.7      | 3.4         | 80.6 |
| 3     | FA            | 6        | 100.0          | 62.8      | /     | /        | /    | /         | 13.4      | 7.6         | 83.7 |
| 4     | FA            | 8        | 100.0          | 69.5      | /     | /        | /    | /         | 2.6       | 9.6         | 81.7 |
| 5     | FA            | 12       | 100.0          | 79.8      | /     | /        | /    | /         | 1.3       | 10.1        | 91.3 |
| 6     | FHOH          | 2        | 100.0          | 36.0      | 12.8  | 2.3      | 7.2  | /         | 26.5      | 1.8         | 86.6 |
| 7     | FHOH          | 4        | 100.0          | 45.9      | 8.1   | /        | 3.5  | /         | 23.1      | 3.3         | 83.9 |
| 8     | FHOH          | 6        | 100.0          | 63.2      | /     | /        | /    | /         | 15.4      | 6.5         | 85.1 |
| 9     | FHOH          | 8        | 100.0          | 75.6      | /     | /        | /    | /         | 2.4       | 6.6         | 84.7 |
| 10    | FHOH          | 12       | 100.0          | 82.6      | /     | /        | /    | /         | 3.8       | 5.6         | 92.0 |
| 11    | BTHF          | 2        | 17.7           | 9.0       | /     | /        | /    | 2.0       | 1.9       | 4.7         | 17.6 |
| 12    | BTHF          | 4        | 28.3           | 18.8      | /     | /        | /    | /         | 6.9       | /           | 25.7 |
| 13    | BTHF          | 6        | 51.6           | 21.6      | /     | /        | /    | 1.1       | 4.8       | 4.4         | 32.0 |
| 14    | BTHF          | 8        | 73.6           | 36.7      | /     | /        | /    | /         | 10.6      | 4.5         | 51.8 |
| 15    | BTHF          | 12       | 80.2           | 39.7      | /     | /        | /    | /         | 10.0      | 4.2         | 53.9 |

<sup>a</sup>Reaction conditions: FA, FHOH or BTHF (0.73 mmol), cyclohexane (10 mL), Pd/C (50 mg), HPW (50 mg), 1 MPa H<sub>2</sub> at room temperature, 100 °C, 400 rpm.

## Molecular fragments in mass spectra

**Table S3** The possible molecular fragments of octane

| Octane (Figure 8, a) |                                | Labeled octane (Figure 8, b) |                                               |
|----------------------|--------------------------------|------------------------------|-----------------------------------------------|
| m/z                  | Molecular fragments            | m/z                          | Molecular fragments                           |
| 29                   | C <sub>2</sub> H <sub>5</sub>  | 31                           | C <sub>2</sub> H <sub>3</sub> D <sub>2</sub>  |
| 43                   | C <sub>3</sub> H <sub>7</sub>  | 46                           | C <sub>3</sub> H <sub>4</sub> D <sub>3</sub>  |
| 57                   | C <sub>4</sub> H <sub>9</sub>  | 60                           | C <sub>4</sub> H <sub>6</sub> D <sub>3</sub>  |
| 71                   | C <sub>5</sub> H <sub>11</sub> | 75                           | C <sub>5</sub> H <sub>7</sub> D <sub>4</sub>  |
| 85                   | C <sub>6</sub> H <sub>13</sub> | 90                           | C <sub>6</sub> H <sub>10</sub> D <sub>4</sub> |
| 114                  | C <sub>8</sub> H <sub>18</sub> | 118                          | C <sub>8</sub> H <sub>14</sub> D <sub>4</sub> |
| /                    | /                              | 119                          | C <sub>8</sub> H <sub>13</sub> D <sub>5</sub> |
| /                    | /                              | 120                          | C <sub>8</sub> H <sub>12</sub> D <sub>6</sub> |
| /                    | /                              | 121                          | C <sub>8</sub> H <sub>11</sub> D <sub>7</sub> |
| /                    | /                              | 122                          | C <sub>8</sub> H <sub>10</sub> D <sub>8</sub> |
| /                    | /                              | 123                          | C <sub>8</sub> H <sub>9</sub> D <sub>9</sub>  |
| /                    | /                              | 124                          | C <sub>8</sub> H <sub>8</sub> D <sub>10</sub> |

## References

1. M. Strohmann, A. Bordet, A. J. Vorholt and W. Leitner, *Green Chemistry*, 2019, **21**, 6299-6306.
2. G. W. Huber, J. N. Chheda, C. J. Barrett and J. A. , *Science*, 2005, **308**, 1446.
3. X. Qi-Neng, C. Qian, L. Xiao-Hui, G. Xue-Qing, L. Guan-Zhong and W. Yan-Qin, *Angewandte Chemie International Edition*, 2014, **53**, 9755-9760.
4. Y. Shao, Q. Xia, X. Liu, G. Lu and Y. Wang, *ChemSusChem*, 2015, **8**, 1761-1767.
5. A. M. Norton, S. Liu, B. Saha and D. G. Vlachos, *ChemSusChem*, 2019, **12**, 4780-4785.
6. P. Wang, Y. Jing, Y. Guo, Y. Cui, S. Dai, X. Liu and Y. Wang, *Catalysis Science & Technology*, 2020, **10**, 4256-4263.
7. M. Chatterjee, K. Matsushima, Y. Ikushima, M. Sato, T. Yokoyama, H. Kawanami and T. Suzuki, *Green Chemistry*, 2010, **12**, 779-782.
8. S. Liu, W. Zheng, J. Fu, K. Alexopoulos, B. Saha and D. G. Vlachos, *ACS Catalysis*, 2019, **9**, 7679-7689.
9. H.-J. Song, J. Deng, M.-S. Cui, X.-L. Li, X.-X. Liu, R. Zhu, W.-P. Wu and Y. Fu, *ChemSusChem*, 2015, **8**, 4250-4255.
10. A. D. Sutton, F. D. Waldie, R. Wu, M. Schlaf, L. A. 'Pete' Silks Iii and J. C. Gordon, *Nature Chemistry*, 2013, **5**, 428.
11. S. Zhu, X. Gao, Y. Zhu, Y. Zhu, X. Xiang, C. Hu and Y. Li, *Applied Catalysis B: Environmental*, 2013, **140-141**, 60-67.
12. W. J. Xu, Q. N. Xia, Y. Zhang, Y. Guo, Y. Q. Wang and G. Z. Lu, *ChemsusChem*, 2011, **4**, 1758-1761.
